# Supplementary material
Source: PubMed Central journal article supplement (PMC2140239)
Supplement: NIHMS27385-supplement-03.pdf [file NIHMS27385-supplement-03.pdf]

CG8502

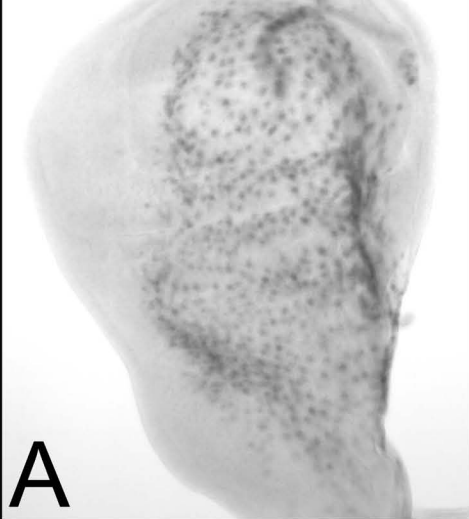

A

CG3893

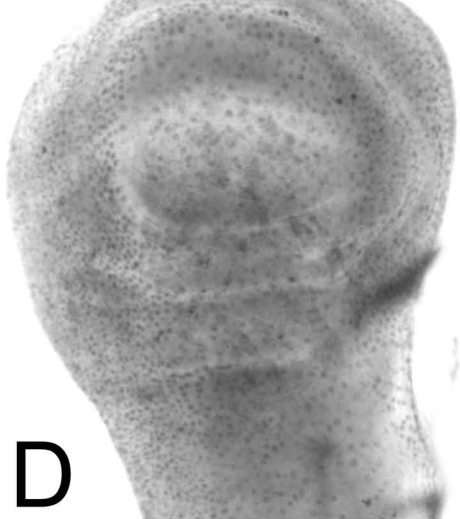

D

CG2657

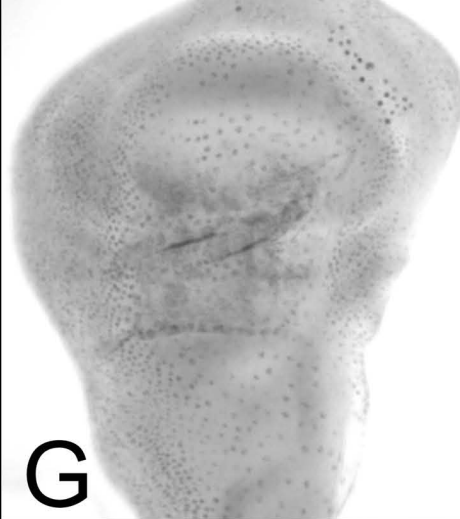

G

CG8502

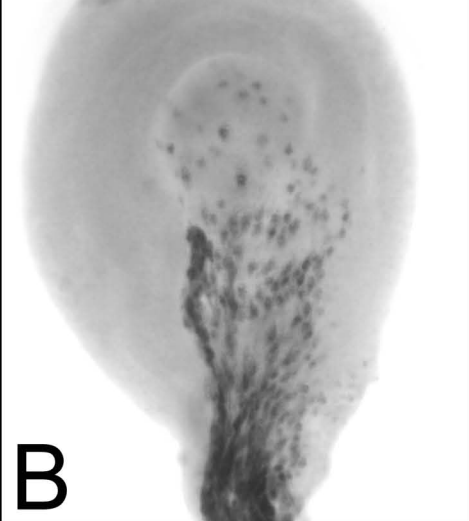

B

CG3893

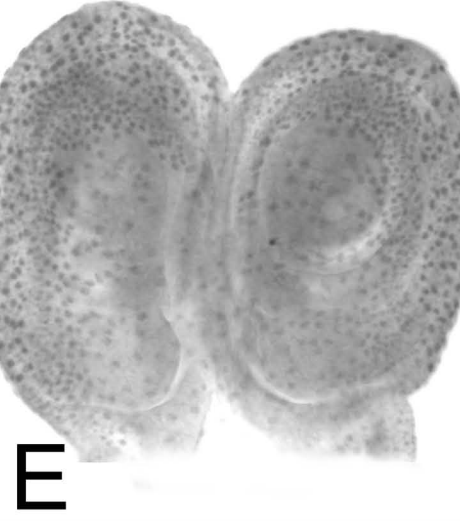

E

Osi23

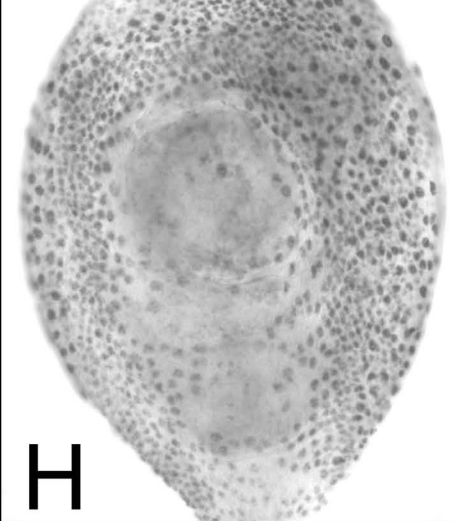

H

dScam

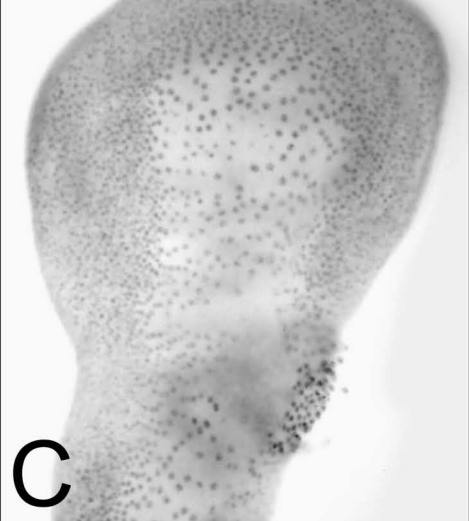

C

CG13890

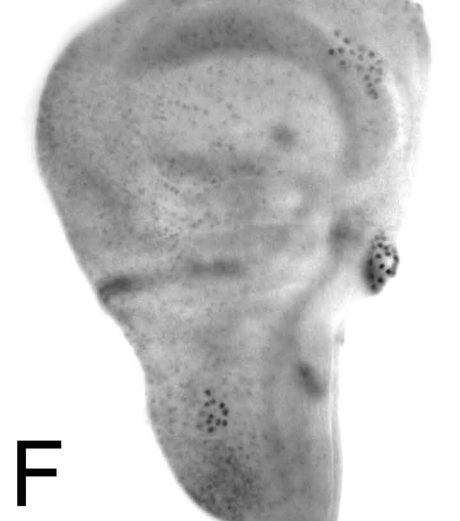

F

CG18854

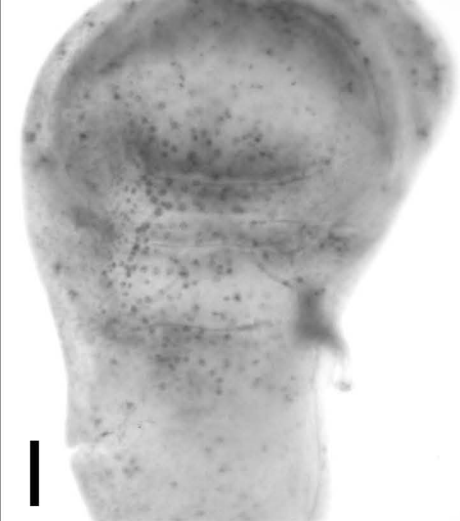

I

### Supplementary Data 3

Localization of differentially expressed transcripts in the peripodial epithelium (PE) of wild type imaginal discs: (A-B) Transcripts of CG8502 are present in the squamous cells of the wing and leg PE respectively; (C) dScam in the wing PE cuboidal cells; (D-E) CG3893 in the wing and leg PE respectively; (G) CG2657 in the wing PE; (H) Osi23 in the leg PE and (I) CG18854 in selective cells in the wing PE.
